# Supplementary material
Source: PubMed Central journal article supplement (PMC10175109)
Supplement: NIHMS1874814-supplement-1.pdf [file NIHMS1874814-supplement-1.pdf]

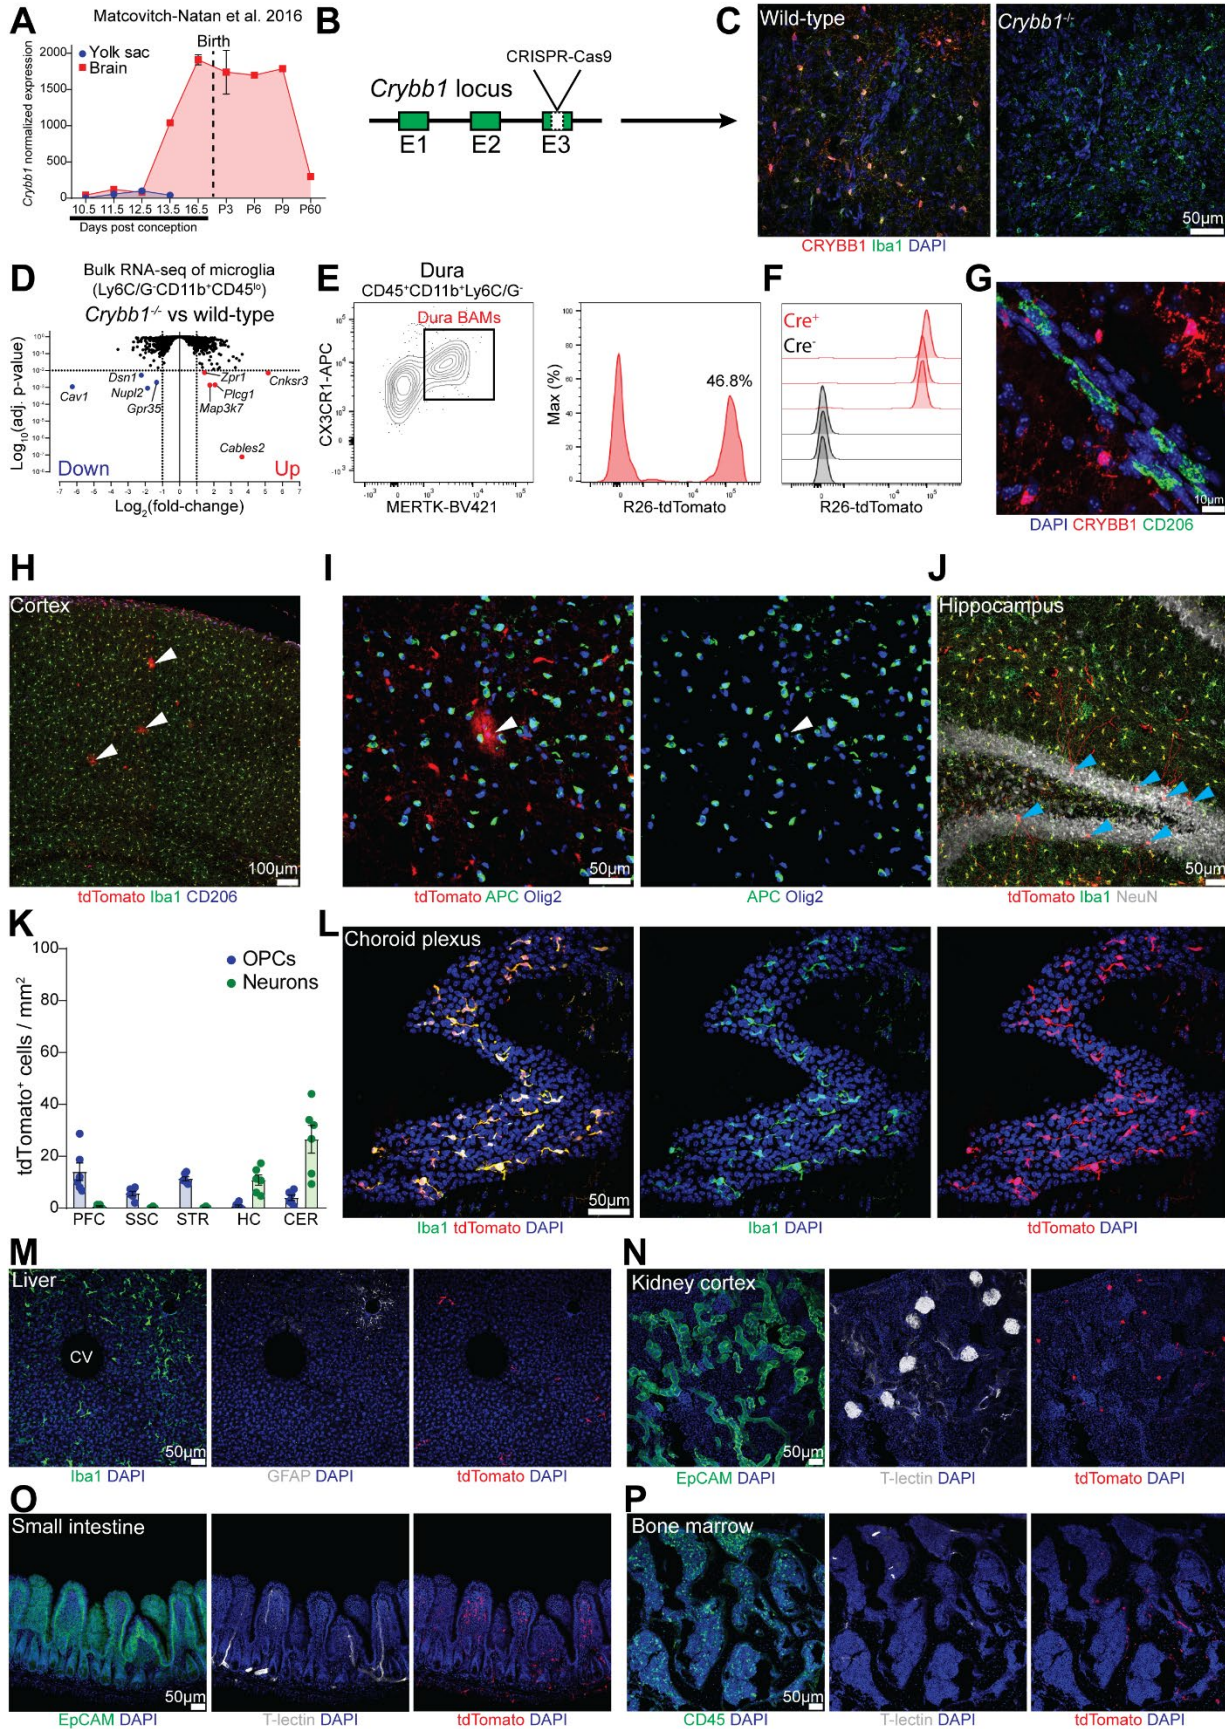

**Figure S1. *Crybb1-Cre* produces sparse off-target recombination in OPCs and neurons, Related to Figure 1**

(A) Normalized expression of *Crybb1* in yolk sac and brain macrophages at multiple timepoints during development <sup>[27]</sup>.

(B) Cartoon describing the generation of *Crybb1*<sup>-/-</sup> line.

(C) Representative confocal images of CRYBB1 and Iba1 staining in the brain of wild-type and *Crybb1*<sup>-/-</sup> mice (n=2 mice/genotype, 2 months old, single experiment).

(D) Bulk RNA-seq of microglia sorted from wild-type and *Crybb1*<sup>-/-</sup> mice (n=3 mice/genotype, 2-4 months old).

(E) Representative gating of dura BAMs in *Crybb1-Cre* : *R26-tdTomato* mice (n=3 mice, 8 weeks old, single experiment).

(F) Representative tdTomato expression in microglia from *Crybb1-Cre* : *R26-tdTomato* and *R26-tdTomato* littermate mice (n=3 mice/genotype, 4 weeks old, single experiment).

(G) Representative confocal image of CRYBB1 and CD206 staining in the brain of wild-type mice (n=2 mice, 2 months old, single experiment).

(H) Representative confocal image of Iba1 and CD206 staining in the brain *Crybb1-Cre* : *R26-tdTomato* mice (white arrowheads = tdTomato<sup>+</sup>Iba1<sup>-</sup>CD206<sup>-</sup> cells, n=6 mice, 2-3 months old, two independent experiments).

(I) Representative confocal images of APC and OLIG2 staining in the brain *Crybb1-Cre* : *R26-tdTomato* mice (white arrowheads = tdTomato<sup>+</sup>OLIG2<sup>+</sup> cells, n=6 mice, 2-3 months old, two independent experiments).

(J) Representative confocal image of Iba1 and NeuN staining in the dentate gyrus (DG) of *Crybb1-Cre* : *R26-tdTomato* mice (blue arrowheads = tdTomato<sup>+</sup>NeuN<sup>+</sup> cells, n=6 mice, 2-3 months old, two independent experiments).

(K) Number of recombinant OPCs and neurons per mm<sup>2</sup> in prefrontal cortex (PFC), somatosensory cortex (SSC), striatum (STR), hippocampus (HC), and cerebellum (CER) from *Crybb1-Cre* : *R26-tdTomato* mice (n=6 mice, 2-3 months old, pool of two independent experiments).

(L) Representative confocal image of choroid plexus from *Crybb1-Cre* : *R26-tdTomato* mice (n=4 mice, 2 months old, single experiment).

(M) Representative confocal image of liver from *Crybb1-Cre* : *R26-tdTomato* mice (CV= central vein, n=4 mice, 2 months old, single experiment).

(N) Representative confocal image of kidney from *Crybb1-Cre* : *R26-tdTomato* mice (n=4 mice, 2 months old, single experiment).

(O) Representative confocal image of small intestine from *Crybb1-Cre : R26-tdTomato* mice (n=4 mice, 2 months old, single experiment).

(P) Representative confocal image of femoral bone marrow from *Crybb1-Cre : R26-tdTomato* mice (n=4 mice, 2 months old, single experiment).

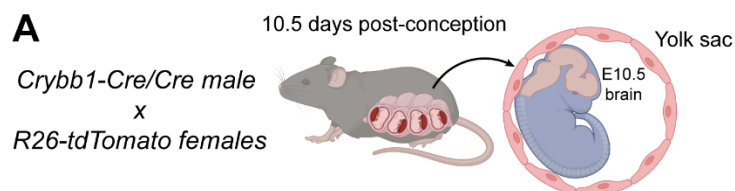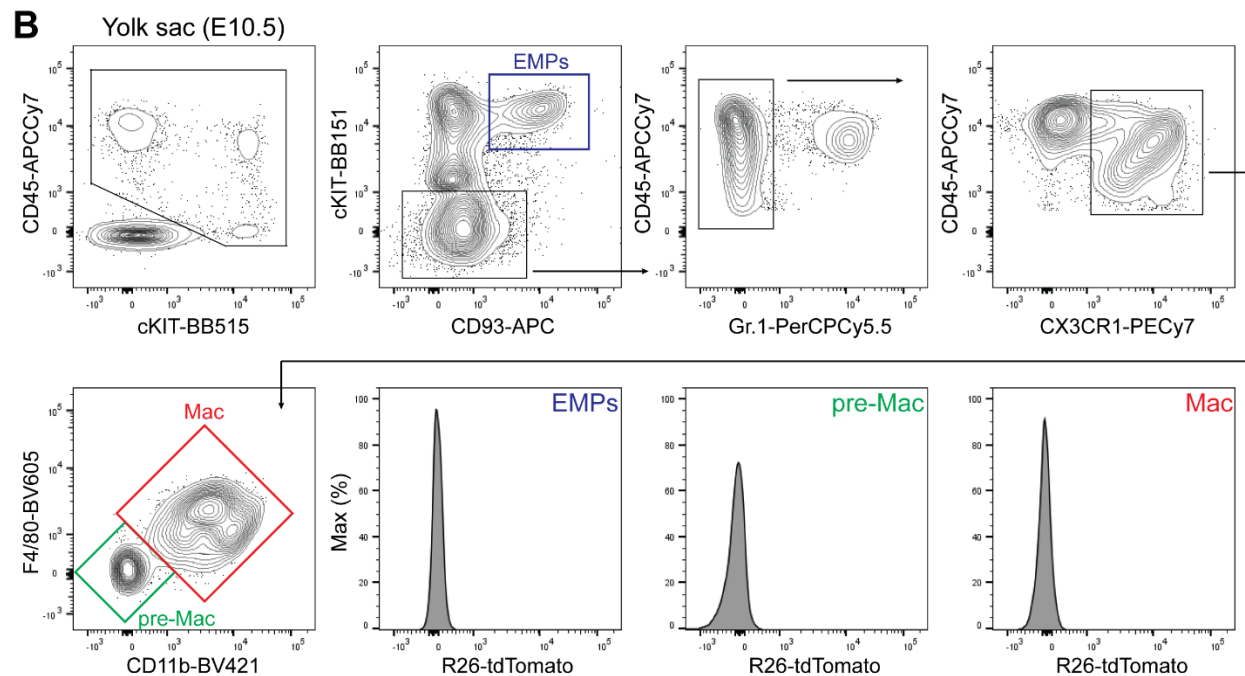

**C** Yolk sac *Crybb1-Cre* : *R26-tdTomato* (E8.5)

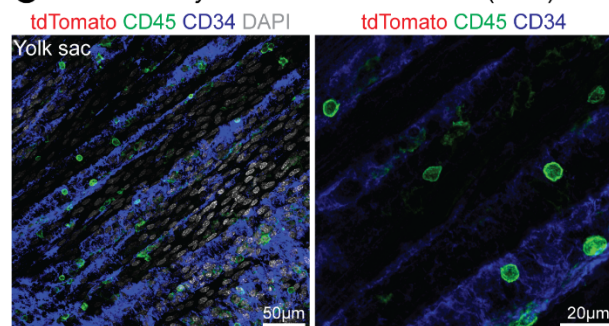

**D** Brain cortex *Crybb1-tdTomato* (E18.5)

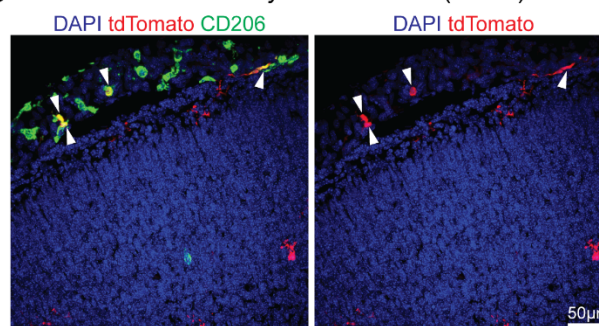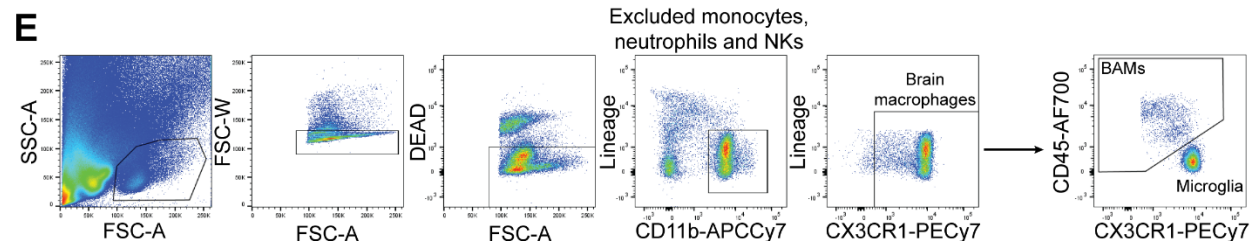

**Figure S2. *Crybb1* is expressed in brain macrophages during embryonic development, Related to Figure 2**

(A) Cartoon describing the experimental design.

(B) Representative FACS plot of yolk sac EMPs, pre-macrophages (pre-Mac) and macrophages (Mac) in *Crybb1-Cre : R26-tdTomato* E10.5 embryos (n=6 YS, pooled into 3 replicate samples, single experiment).

(C) Representative confocal image of CD45 and CD34 staining in the yolk sac of *Crybb1-Cre : R26-tdTomato* E8.5 embryos (n=5 YS, single experiment).

(D) Representative confocal image of CD206<sup>+</sup> BAMs in the forebrain cortex of *Crybb1-tdTomato* E18.5 embryos (n=5 embryos, single experiment).

(E) FACS gating strategy for BAMs.

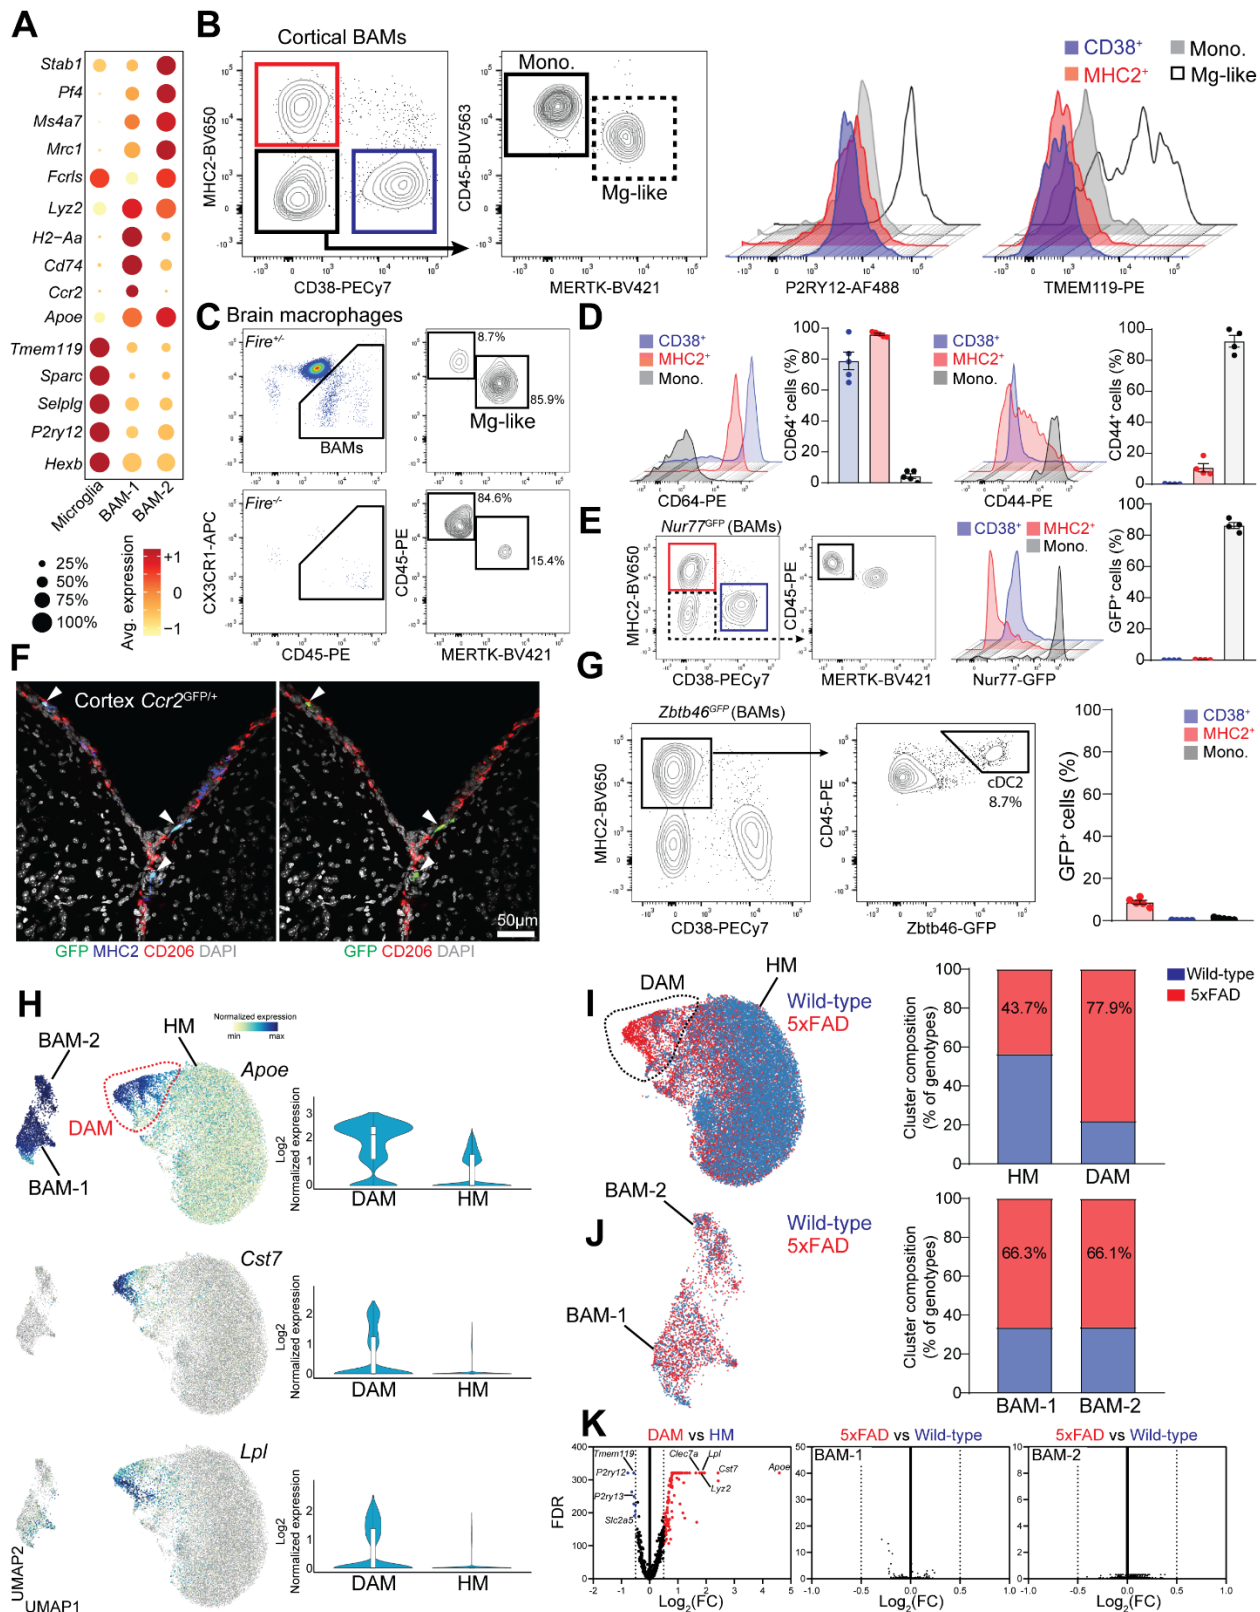

**Figure S3, BAM subsets are marginally affected in the 5xFAD model of amyloid pathology, Related to Figure 3**

(A) Dot-plot of selected signature genes for microglia, BAM-1 and BAM-2 populations.

(B) Representative FACS plot of different BAM subsets stained for P2RY12 and TMEM119 (n=4, 10-week-old, single experiment).

(C) Representative FACS plot of brain monocytes and Mg-like populations in *Fire*<sup>+/-</sup> and *Fire*<sup>-/-</sup> mice (n=2, 3-month-old, single experiment).

(D) Representative FACS plot and quantification of different BAM subsets stained for CD64 or CD44 (n=5-4 mice, 2-month-old, single experiment).

(E) Representative FACS plot and quantification of *Nur77* (*Nr4a1*) expression in different BAM subsets from *Nur77*<sup>GFP</sup> mice (n=4 mice, 2-month-old, single experiment)

(F) Representative confocal image of CD206 and MHC2 staining in the brain of *Ccr2*<sup>GFP</sup> mice (n=5, 3-month-old, single experiment).

(G) Representative FACS plot and quantification of *Zbtb46* expression in different BAM subsets from *Zbtb46*<sup>GFP</sup> mice (n=5 mice, 10-week-old, single experiment)

(H) UMAP plot of microglia and BAMs from wild-type and 5xFAD littermate mice. Distinct signature of the DAM cluster displayed by violin plots (n=4-5 mice/genotype, 8-month-old).

(I) Genotype composition of HM and DAM clusters.

(J) Genotype composition BAM-1 and BAM-2 clusters.

(K) Differential gene expression analysis of DAM vs HM, and 5xFAD vs wild-type for BAM-1 and BAM-2 clusters.

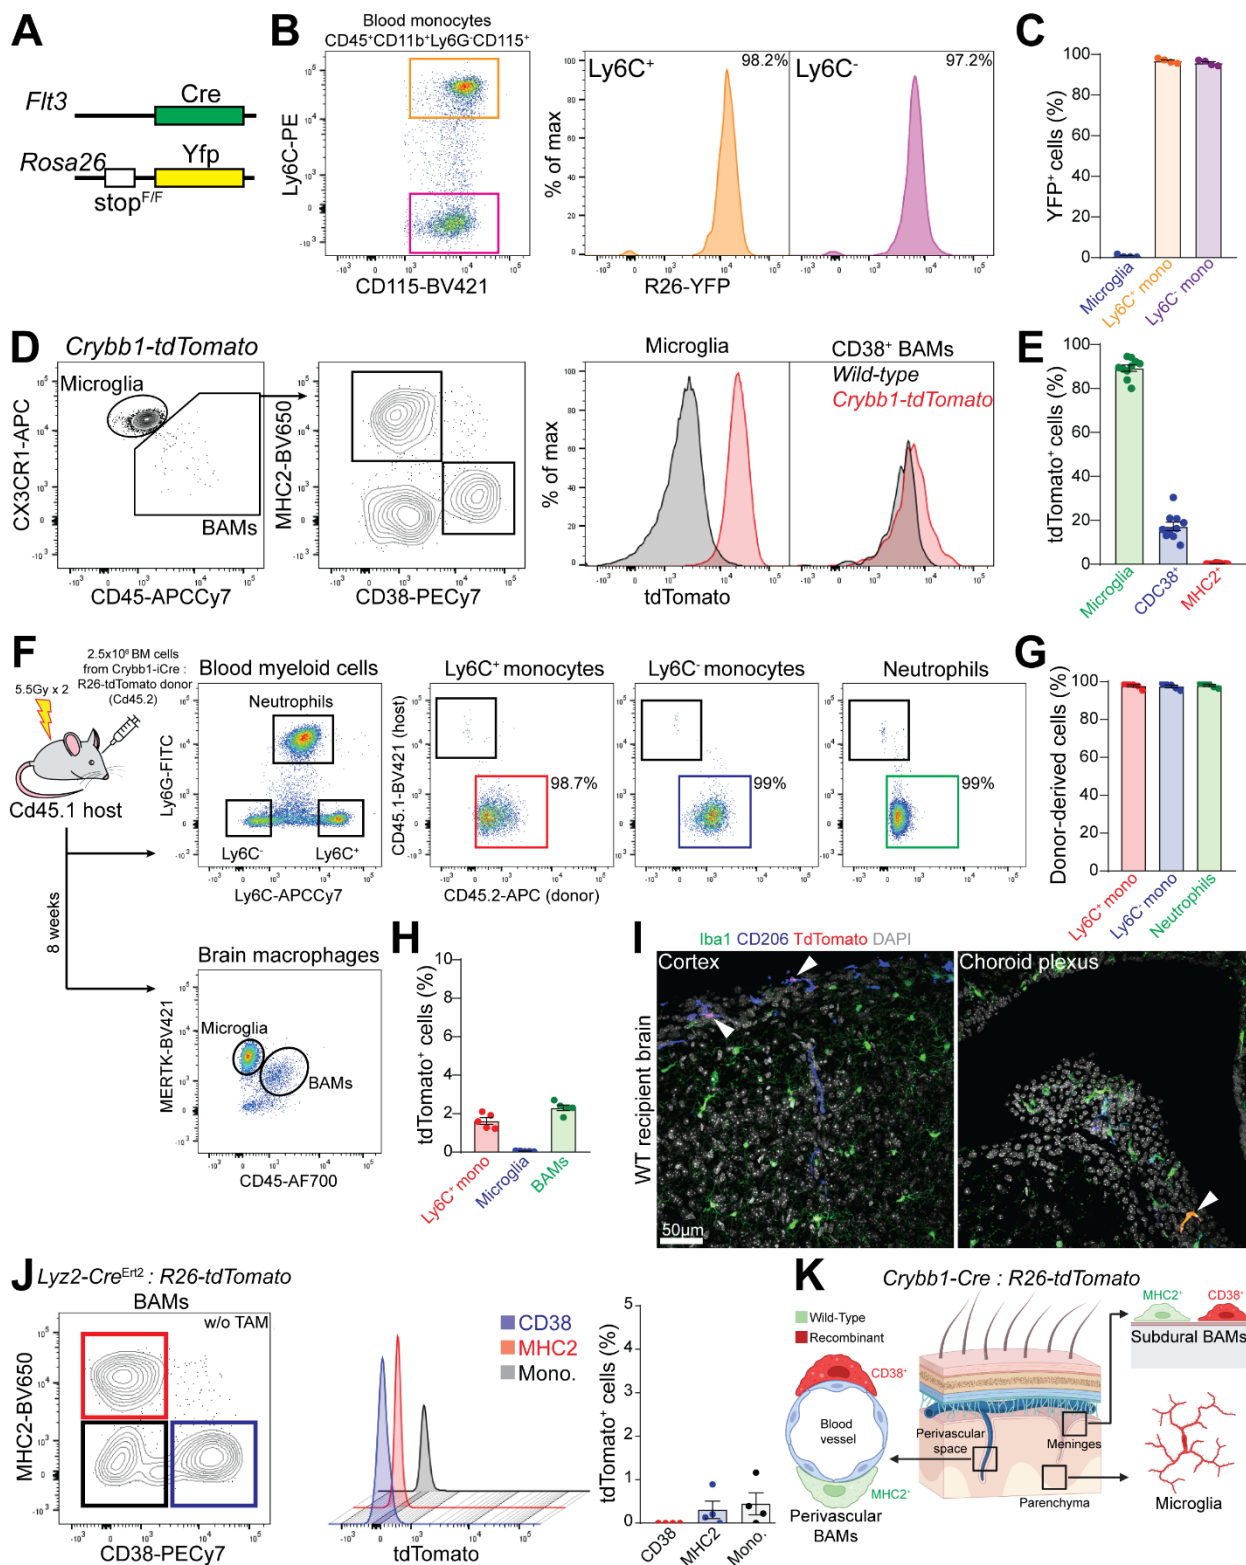

**Figure S4. *Crybb1-Cre* does not recombine in bone-marrow derived BAMs, Related to Figure 4**

- (A) Cartoon describing the generation of the *Flt3-Cre : R26-Yfp* line.
- (B) Representative FACS plot of blood monocytes from *Flt3-Cre : R26-Yfp* mice.
- (C) Percentage of YFP<sup>+</sup> monocytes and microglia from *Flt3-Cre : R26-Yfp* mice (n=4 mice, 3-months-old, single experiment).
- (D) Representative FACS plot of microglia and BAMs from *Crybb1-tdTomato* mice.
- (E) Percentage of tdTomato<sup>+</sup> microglia and BAMs from *Crybb1-tdTomato* mice (n=10 mice, 2-months-old, pool of three independent experiments).
- (F) Representative FACS plot of blood myeloid cells and brain macrophages in *Cd45.1* Bl6 recipient mice, reconstituted with  $2.5 \times 10^6$  *Crybb1-Cre : R26-tdTomato* BM cells. Mice analyzed 8 weeks after transplant.
- (G) Percentage of donor-derived (CD45.2<sup>+</sup>) blood myeloid cells 8 weeks after transplantation of *Crybb1-Cre : R26-tdTomato* BM (n=5 mice, 4-month-old, single experiment).
- (H) Percentage of tdTomato<sup>+</sup> blood monocytes, microglia, and BAMs 8 weeks after transplantation of *Crybb1-Cre : R26-tdTomato* BM (n=5 mice, 4-month-old, single experiment).
- (I) Representative confocal image of Iba1 and CD206 staining in the brain of *Cd45.1* Bl6 recipient mice 8 weeks after transplantation of *Crybb1-Cre : R26-tdTomato* BM (n=3 mice, 4-month-old, single experiment).
- (J) Representative FACS plot and percentage of recombination in different BAM subsets from *Lyz2<sup>CreErt2</sup> : R26-tdTomato* mice under TAM-free condition (n=4 mice, 2-3-month-old, single experiment).
- (K) Cartoon summarizing the recombination pattern in *Crybb1-Cre : R26-tdTomato* mice.

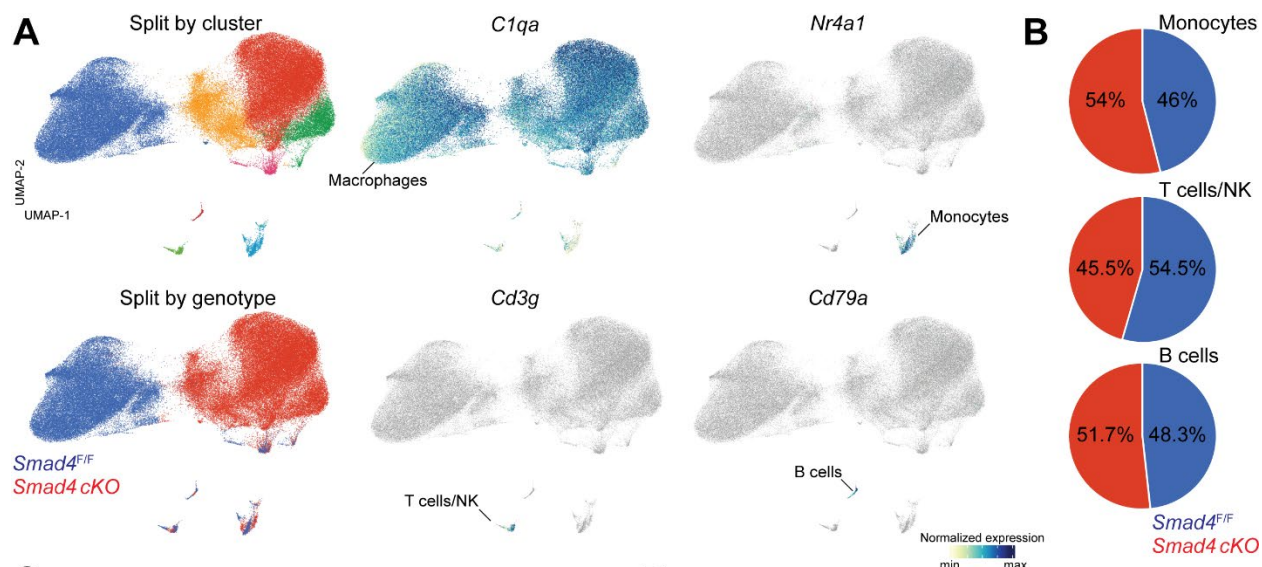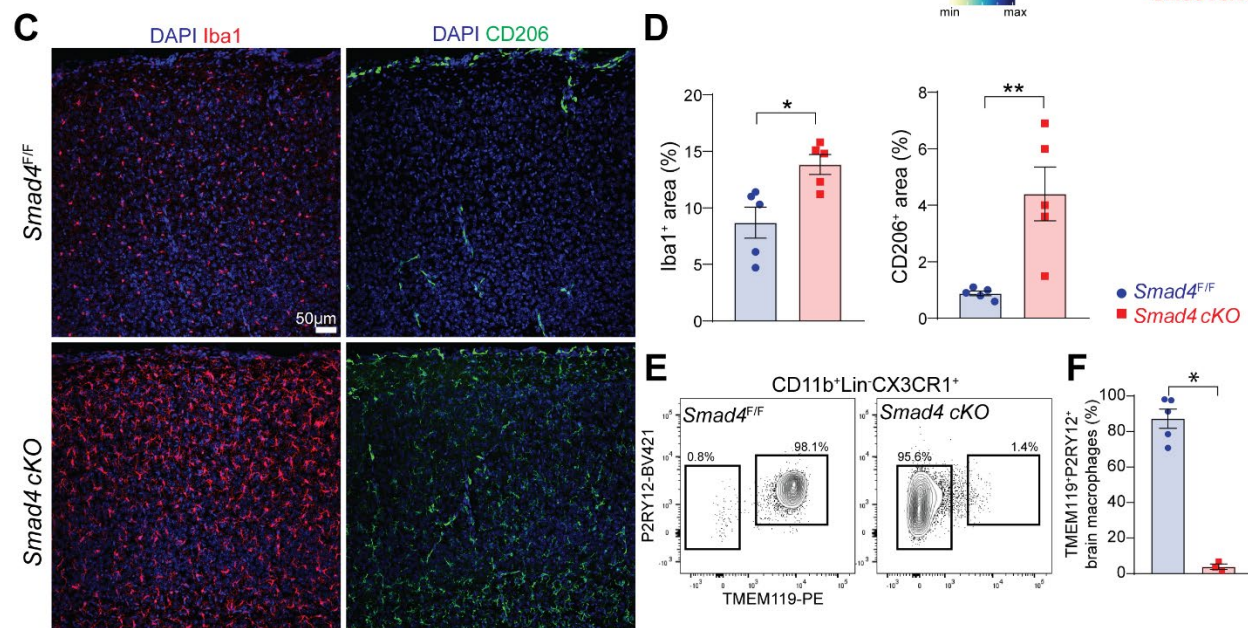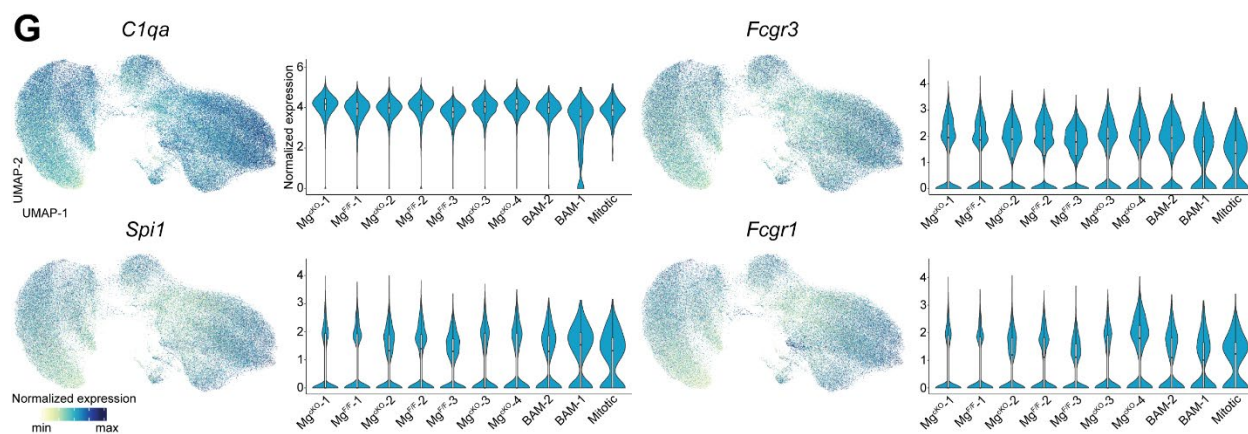

**Figure S5. SMAD4-deficient microglia exhibit a loss of homeostatic signature; however, the macrophage core signature is not affected, Related to Figure 5**

(A) UMAP plot of CD45<sup>+</sup>Ly6G<sup>-</sup> brain immune cells from *Smad4*<sup>F/F</sup> and *Smad4* cKO littermate mice, split either by cluster or genotype. Enrichment of chosen lineage marker genes is displayed (n=4 mice/genotype, 6-8 weeks old).

(B) Genotype composition of monocytes, T/NK cells and B cells clusters.

(C) Representative confocal images of Iba1 and CD206 staining in the brain of *Smad4*<sup>F/F</sup> and *Smad4* cKO mice.

(D) Percentage of Iba1 and CD206 covered areas in the brain of *Smad4*<sup>F/F</sup> and *Smad4* cKO mice (n=5 mice/genotype, 4-week-old, displayed mean values of three sections per mouse, Mann-Whitney U test, \*P<0.05, \*\*P<0.01, pool of two independent experiments)

(E) Representative FACS plot of P2RY12 and TMEM119 staining in brain macrophages from *Smad4*<sup>F/F</sup> and *Smad4* cKO mice.

(F) Percentage of P2RY12<sup>+</sup>TMEM119<sup>+</sup> brain macrophages from *Smad4*<sup>F/F</sup> and *Smad4* cKO littermate mice (n=3-5 mice/genotype, 4-week-old, Mann-Whitney U test, \*P<0.05, single experiment).

(G) UMAP and violin plots displaying the expression of macrophage lineage genes in microglia and BAMs from *Smad4*<sup>F/F</sup> and *Smad4* cKO mice.

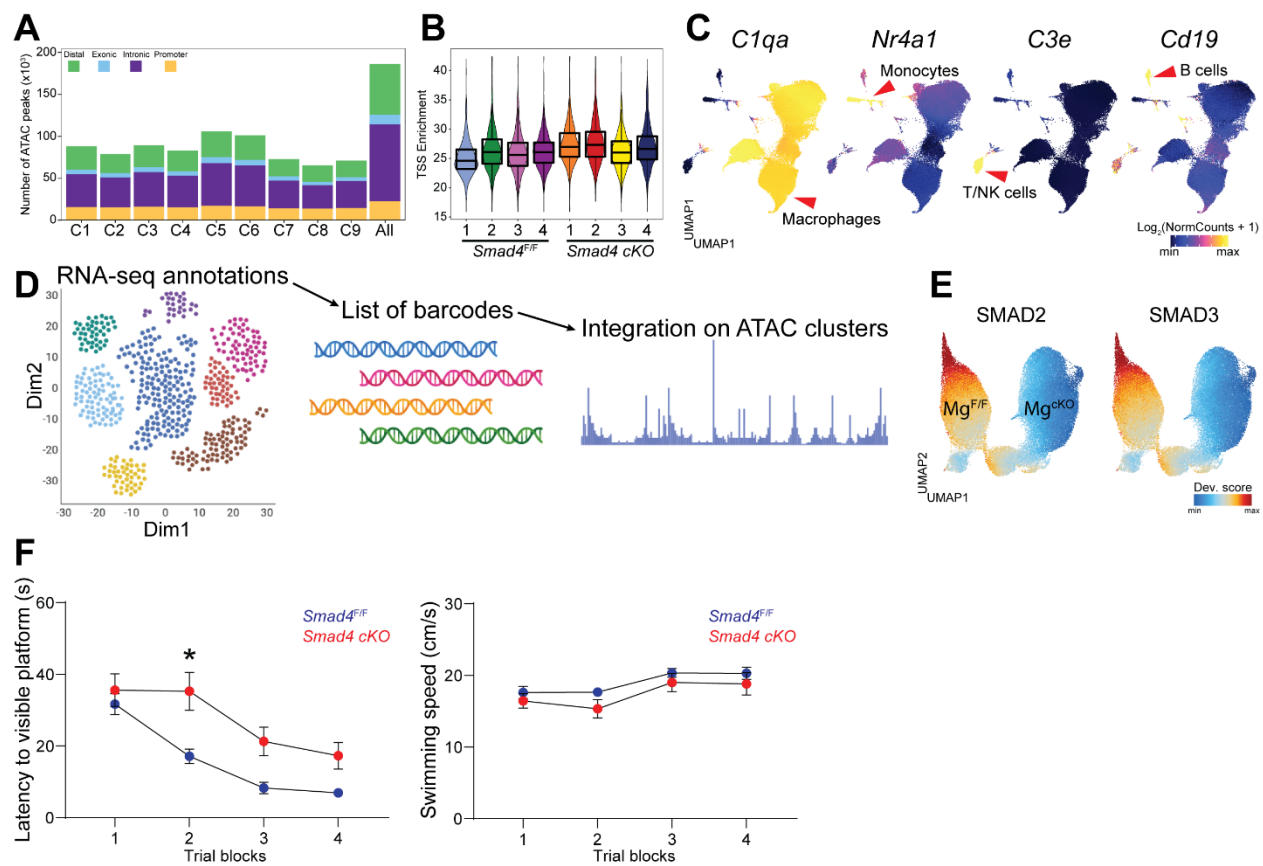

**Figure S6. scATAC-seq recapitulates the same populations identified by scRNA-seq and reveals altered enrichment of TFs binding motifs in SMAD4-deficient microglia, Related to Figure 6**

(A) Number of peaks called for each cluster.

(B) Number of fragments per cell and enrichment of Tn5 insertions in transcription start sites (TSS) for each sample.

(C) scATAC-seq profiles colored by accessibility of the indicated gene (red arrowhead = cell population).

(D) Cartoon describing the scATAC-seq annotation strategy

(E) UMAP of the scATAC-seq profiles colored by enrichment of the SMAD2/3 motifs.

(F) Morris Water Maze test on *Smad4<sup>F/F</sup>* and *Smad4 cKO* littermate mice assessing latency time to visible platform and swimming speed (n=14 *Smad4<sup>F/F</sup>* and n=8 *Smad4 cKO*, 3-4-month-old, two-way ANOVA with Bonferroni post-hoc test, \*P<0.05, pool of three independent experiments).
